# Supplementary material
Source: Springer Nature journal article supplement (https://springermedizin.de/resource/supplementary/12931_2012_1253_MOESM1_ESM.pdf/9425832)

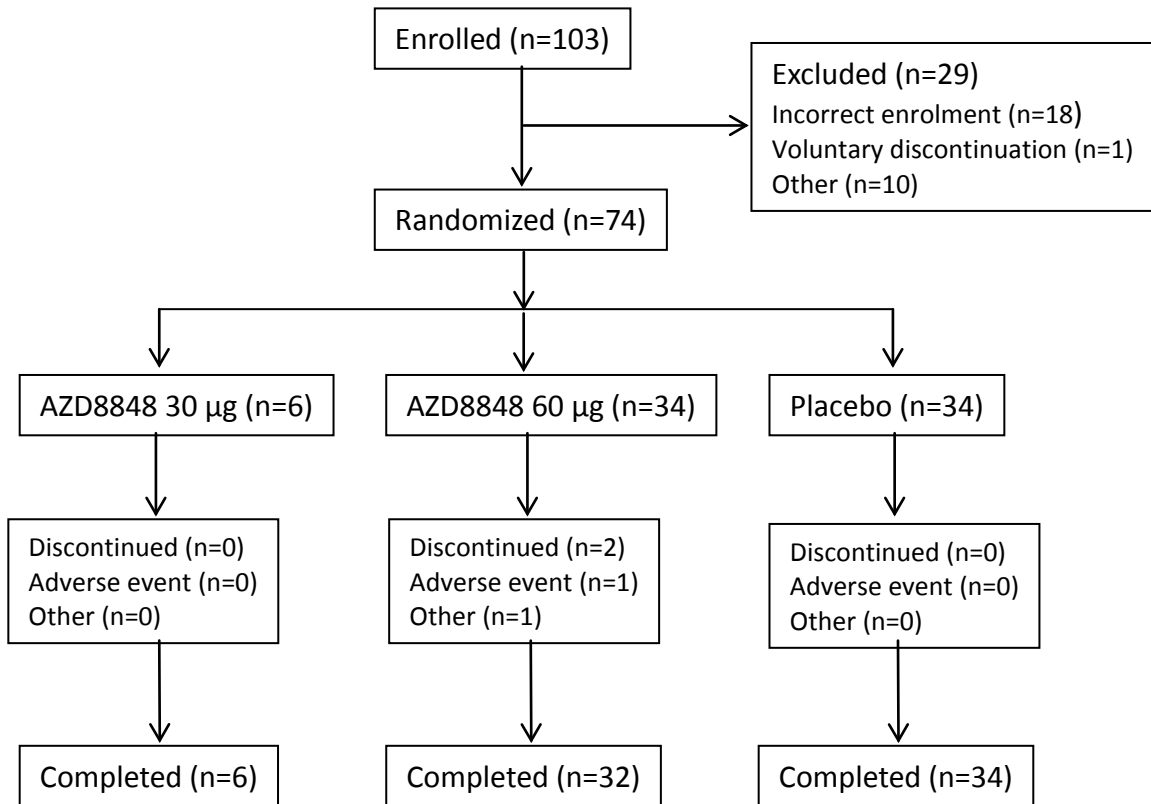

Supplement: MOESM1 [file 9425832]
